# Supplementary material for: The solvent-free mechano-chemical grinding of a bifunctional P25–graphene oxide adsorbent–photocatalyst and its configuration as porous beads
Source: Royal Society of Chemistry journal article supplement (doi:10.1039/d2ra04017d), 2022-01-01

## Supporting Information

### Solvent-free mechano-chemical grinding of bifunctional P25-graphene oxide adsorbent-photocatalysts and their configuration as porous beads

Fatima-Ezzahra Zirar,<sup>a,b</sup> Nadia Katir,<sup>a</sup> Samir Qourzal,<sup>b</sup> Ihya Ait Ichou,<sup>b</sup> and Abdelkrim El Kadib.<sup>a,\*</sup>

<sup>a.</sup> *Euromed Research Center, Engineering Division, Euro-Med University of Fes (UEMF), Route de Meknes, Rond-point de Bensouda, 30070, Fès, Morocco.*

<sup>b.</sup> *Materials, Photocatalysis and Environment Team, Department of Chemistry, Faculty of Sciences, Ibn Zohr University, B.P. 8106, Dakhla City, Agadir, Morocco*

\*Correspondence: [a.elkadib@ueuromed.org](mailto:a.elkadib@ueuromed.org)

**S1.** Scanning electronic microscopy (SEM) of TiO<sub>2</sub>, GO and the mechanically grinded materials

**S2.** Photo-degradation kinetics of methylene blue, malachite green, congo red and methyl orange.

**S3.** Photodegradation activity of Degusa P25 versus **TiO<sub>2</sub>@GO**

**S4.** Characterisation of **TiO<sub>2</sub>@CS\_pyr**

**S5.** Infrared spectra of the mechanically grinded materials before and after irradiation

**S6.** XRD patterns of the mechanically grinded materials before and after irradiation

**S1. Scanning electronic microscopy (SEM) of  $\text{TiO}_2$ , GO and the mechanically grinded  $\text{TiO}_2@GO$  materials**

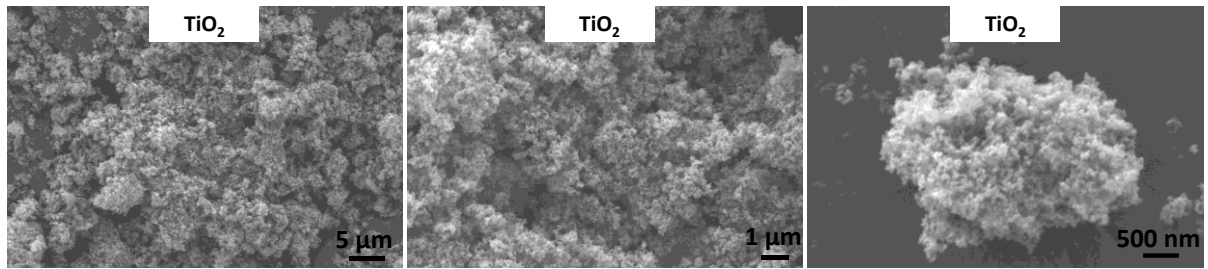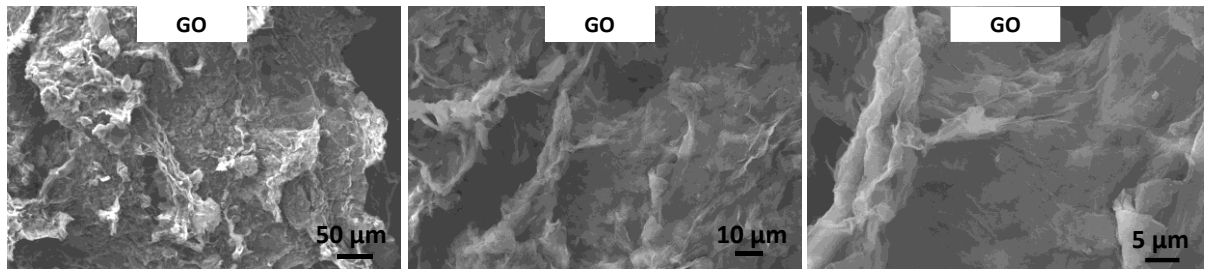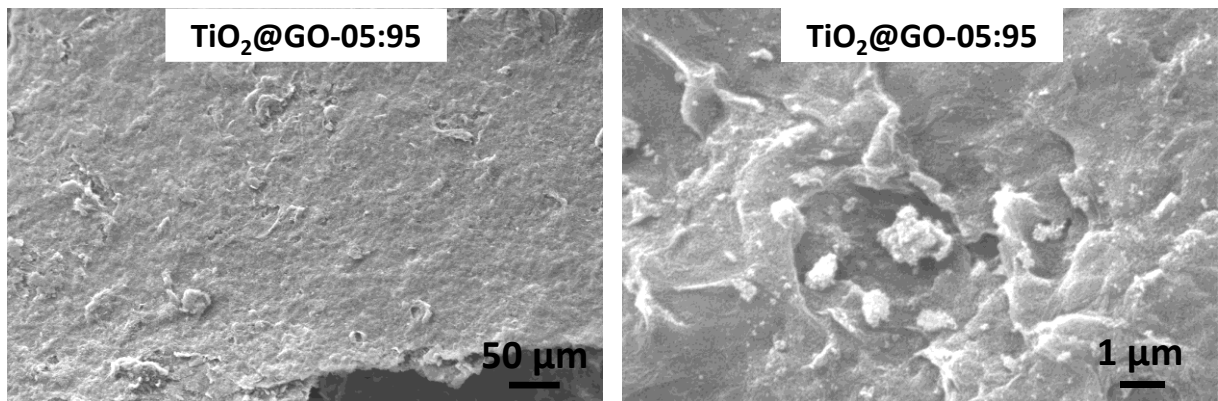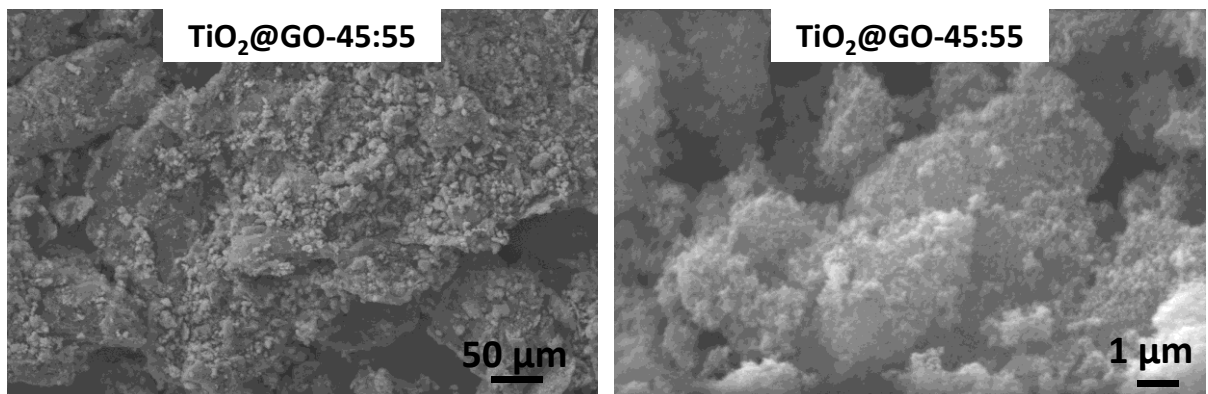

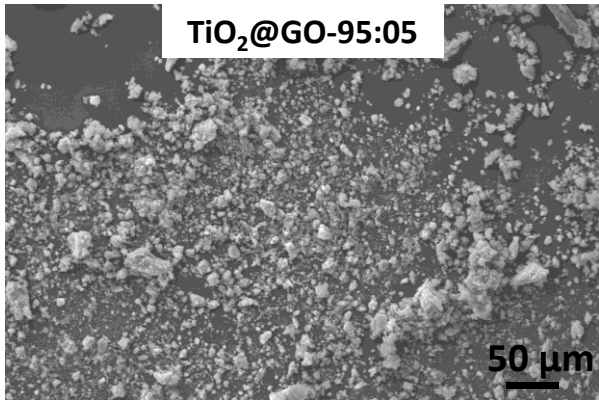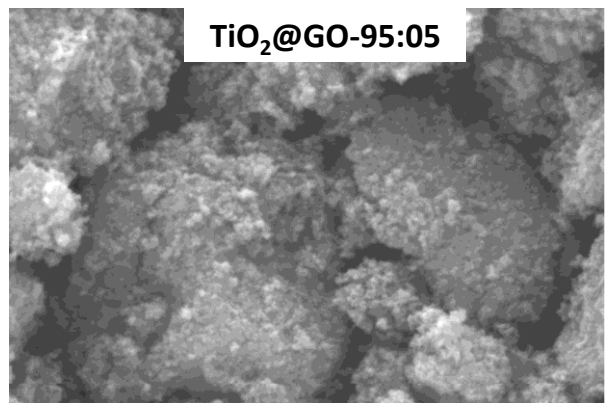

**S2.** Photo-degradation kinetics of methylene blue, malachite green, congo red and methyl orange.

**Methylene blue**

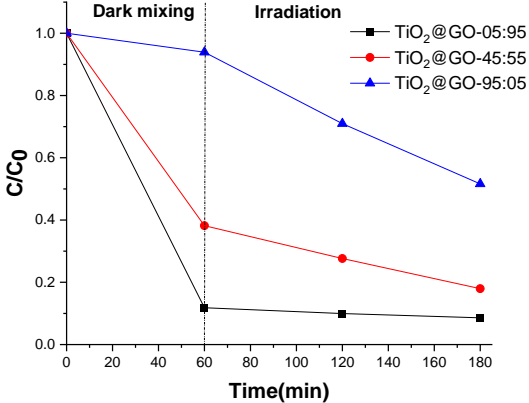

**Green malachite**

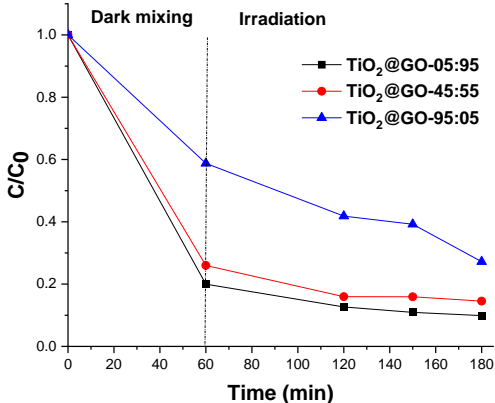

**Congo red**

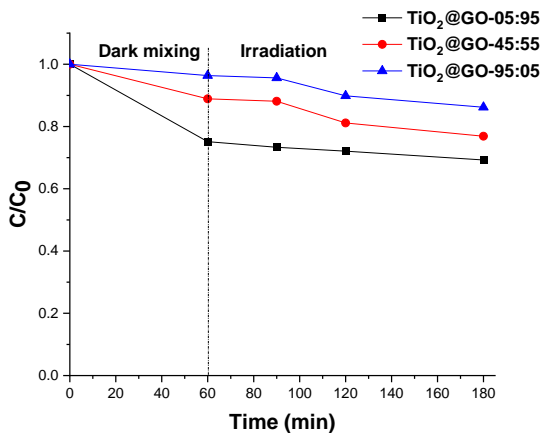

**Methyl orange**

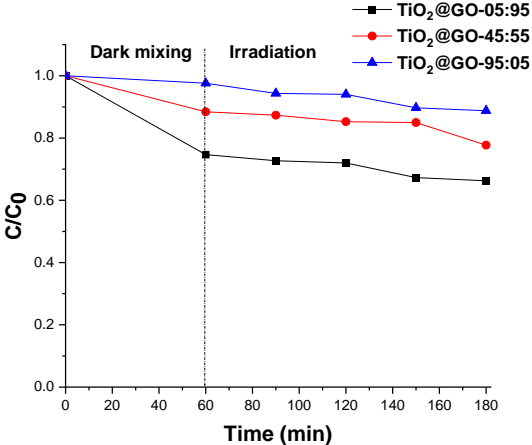

S3. Photodegradation activity of Degusa P25 versus TiO<sub>2</sub>@GO

Methylene blue

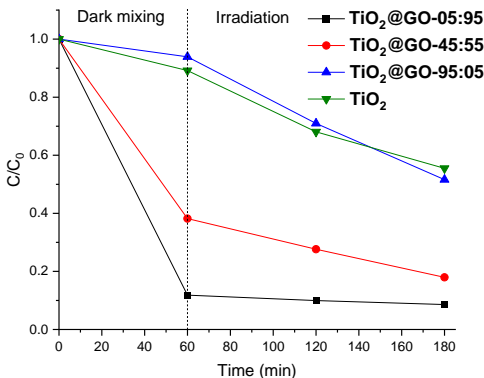

Green malachite

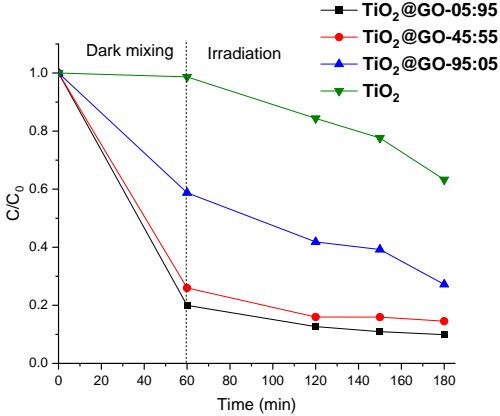

Congo red

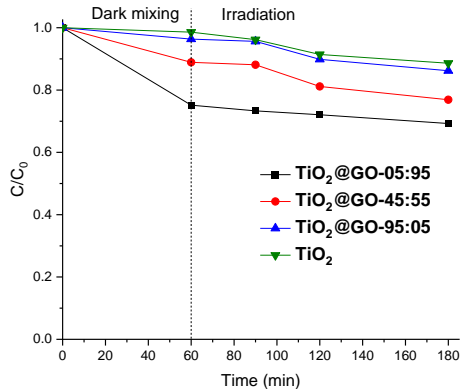

Methyl orange

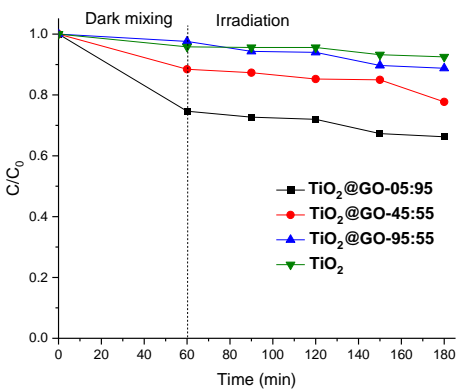

### S4. Characterisation of *TiO<sub>2</sub>@CS\_pyr*

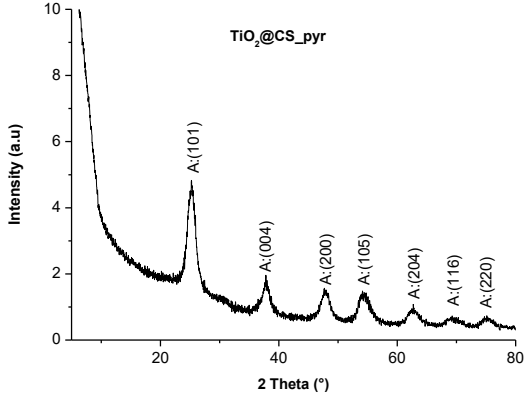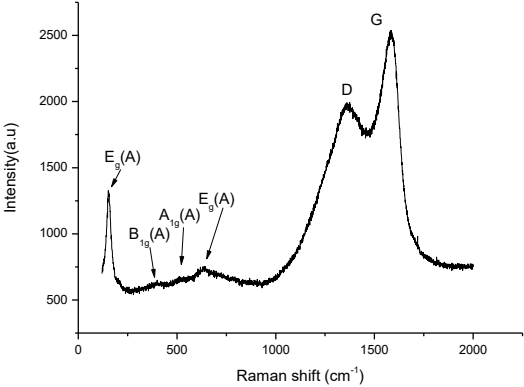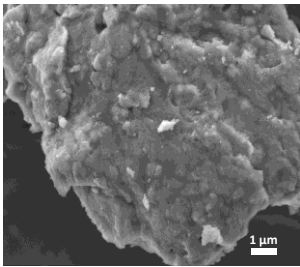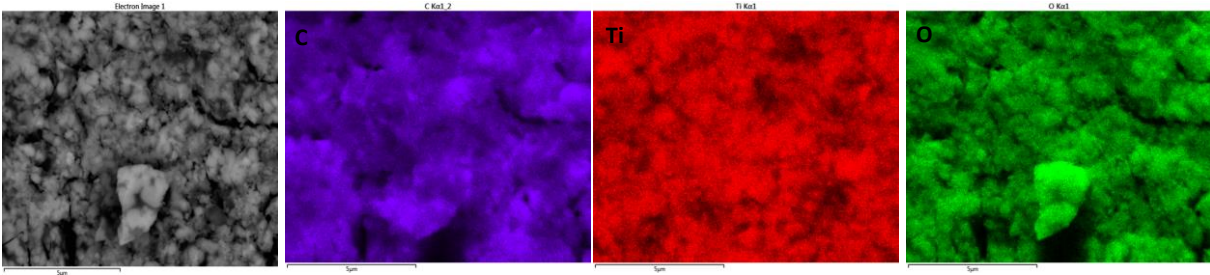

## S5. Infrared spectra of the mechanically grinded materials before and after irradiation

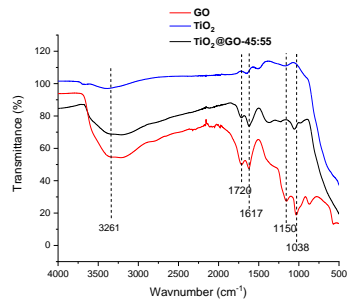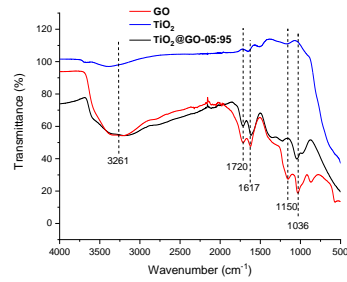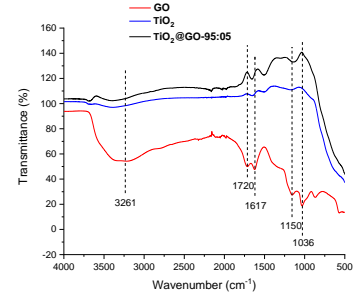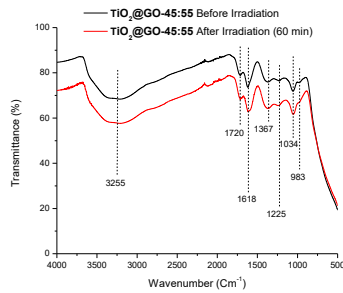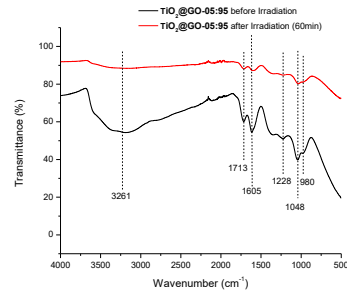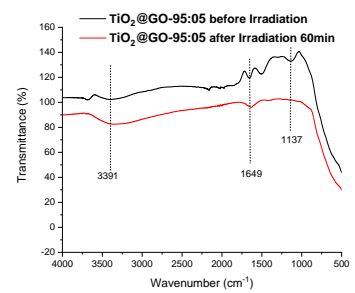

**S6. XRD patterns of the mechanically grinded materials before and after irradiation**

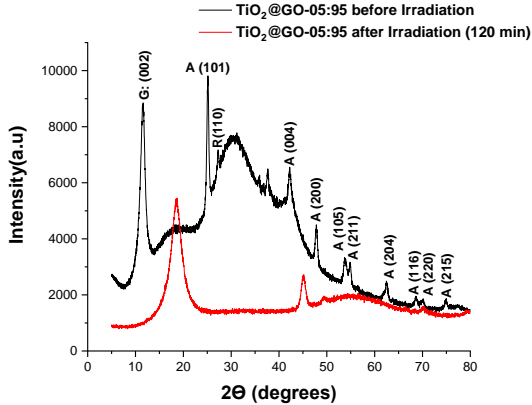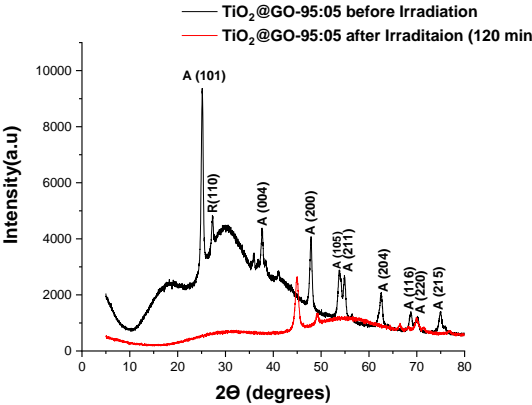

Supplement: d2ra04017d1.pdf [file d2ra04017d1.pdf]
